# Supplementary material for: Swelling-driven rolling and anisotropic expansion of striped gel sheets
Source: Royal Society of Chemistry journal article supplement (doi:10.1039/c3sm50627d), 2013-01-01
Supplement: c3sm50627d.pdf [file c3sm50627d.pdf]

Supporting Information for

## Swelling-Driven Rolling and Anisotropic Expansion of Striped Gel Sheets

Myunghwan Byun,<sup>1</sup> Christian D. Santangelo,<sup>2</sup> and Ryan C. Hayward<sup>1</sup>

<sup>1</sup>Department of Polymer Science and Engineering, University of Massachusetts, Amherst, MA  
01003, USA

<sup>2</sup>Department of Physics, University of Massachusetts, Amherst, MA 01003, USA

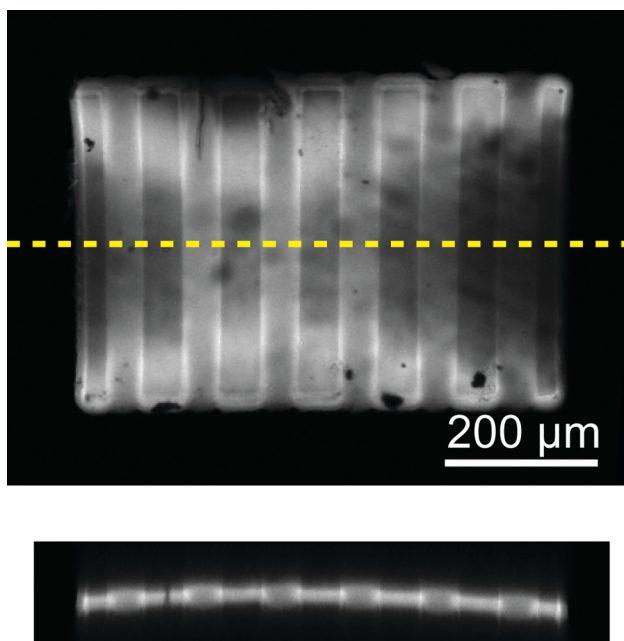

**Figure SI1.** Anisotropically swelled multistrips show a slight degree of buckling around the axis parallel to the interfaces. Laser scanning confocal microscope images (top: plan-view section, bottom: cross-section) reveal that the degree of buckling is modest.
